# Supplementary figures and images for: Taxonomic Insights into Caulerpa (Bryopsidales, Chlorophyta) Species in French Polynesia: Confirmation of 13 Species and Reinstatement of C. pickeringii Harvey & Bailey
Source: MDPI journal article supplement (doi:10.3390/d16040243), 2024-04-18

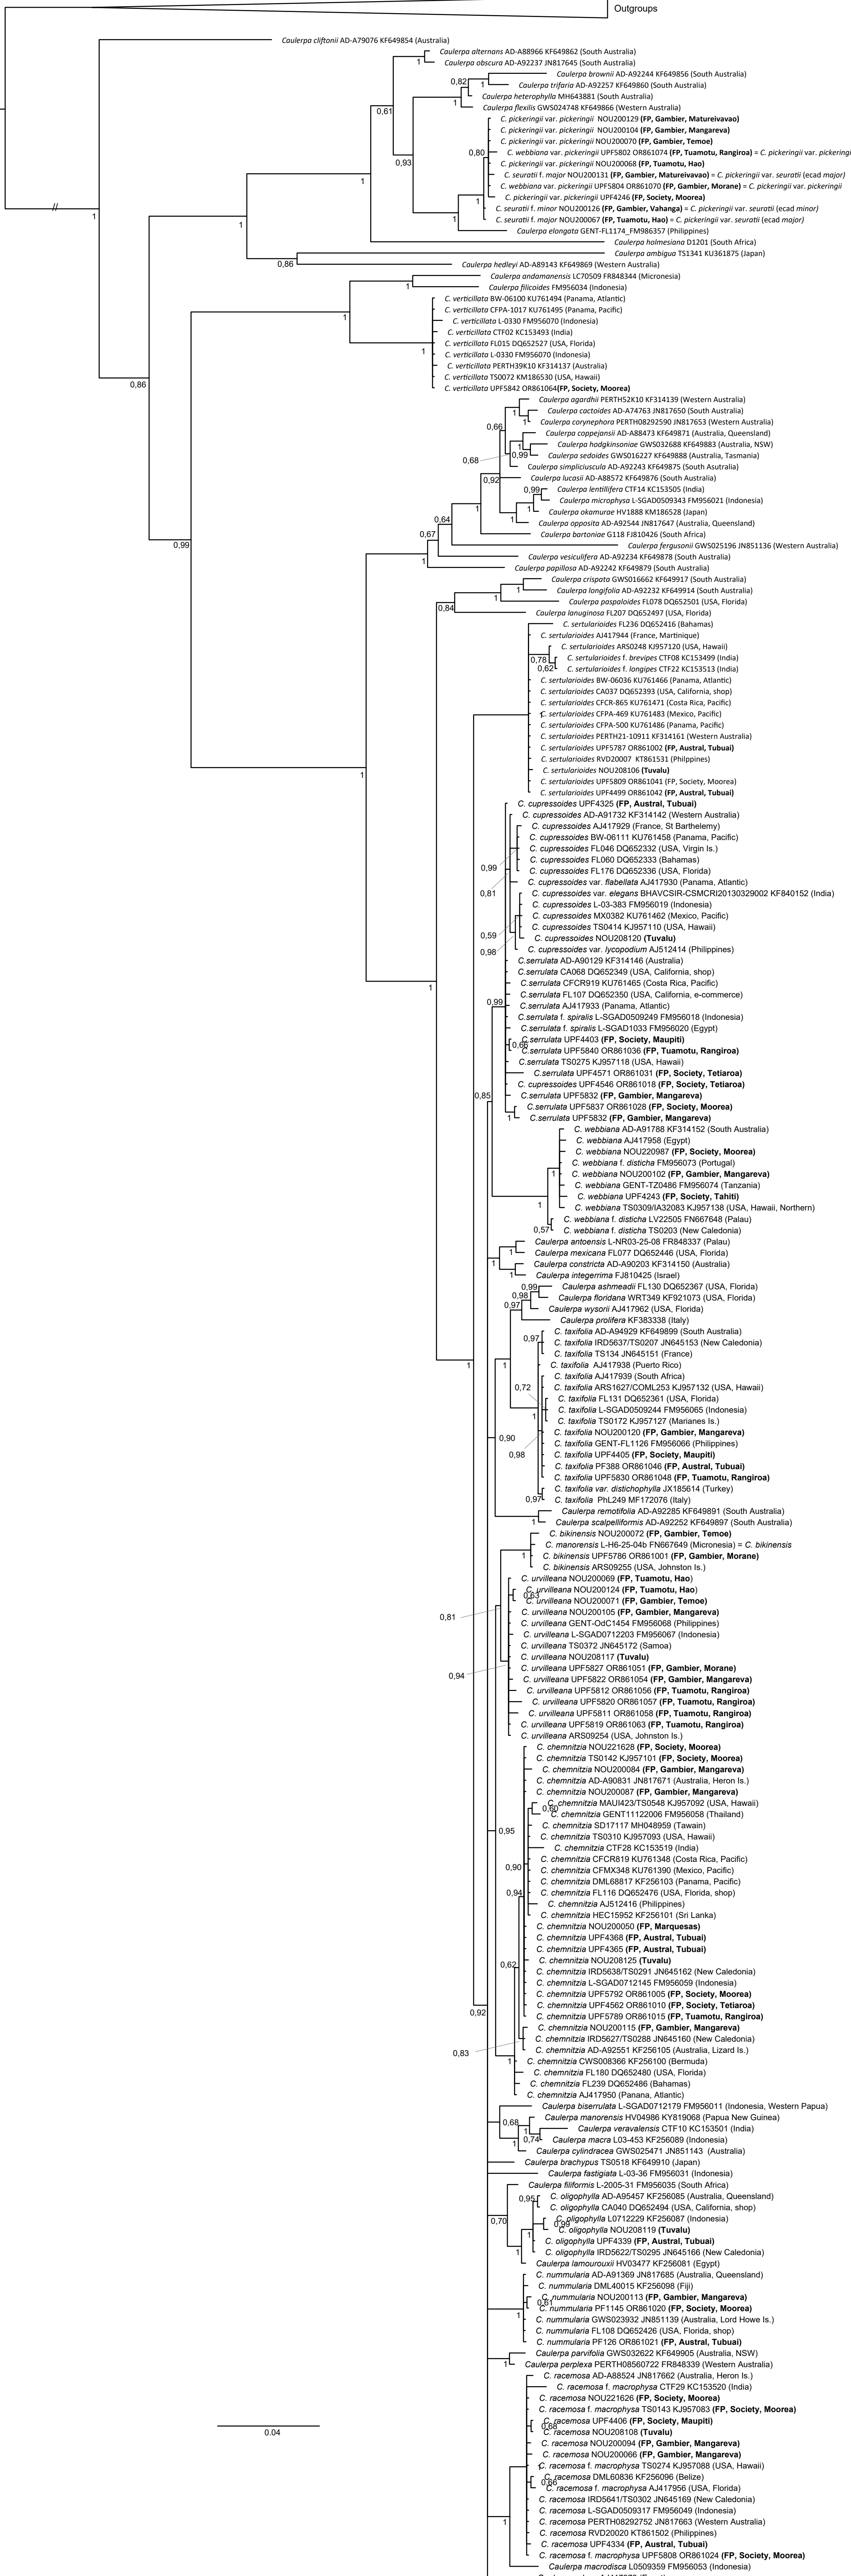

Supplement: s1 [file s1]
